# Supplementary material for: Rapid target gene validation in complex cancer mouse models using re-derived embryonic stem cells
Source: PubMed Central journal article supplement (PMC3927956; doi:10.1002/emmm.201303297), 2014-01-15
Supplement: emmm0006-0212-sd2.pdf [file emmm0006-0212-sd2.pdf]

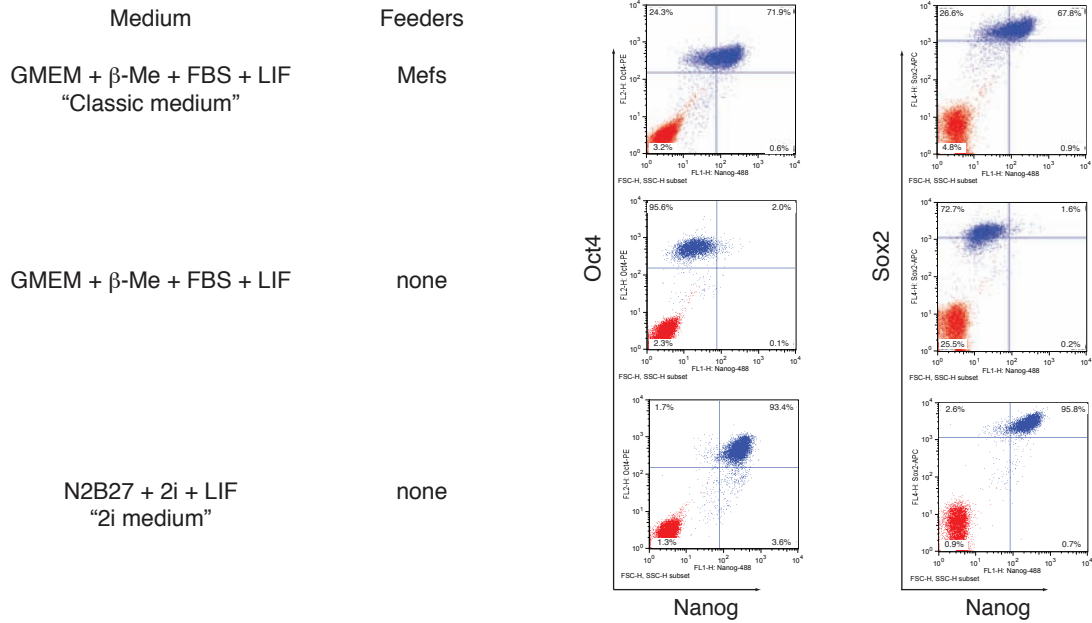

**Supporting Information Figure 1. Expression of stem cell markers in ESCs cultured under different conditions.** FACS analysis for three core ESC transcription factors, Nanog, Oct4 and Sox2 in IB10 ESCs (Robanus-Maandag et al, 1998) (129/Ola background) cultured in the classic and 2i medium. Almost all ESCs (93.4%) cultured in 2i medium highly expressed all three transcription factors and could be considered naïve ESCs capable of contributing to any germ layer. Nanog expression was absent in 24.3% of the ESCs cultured in the classic conditions and almost entirely lost upon removal of feeders.
