# Supplementary material for: Rapid target gene validation in complex cancer mouse models using re-derived embryonic stem cells
Source: PubMed Central journal article supplement (PMC3927956; doi:10.1002/emmm.201303297), 2014-01-15
Supplement: emmm0006-0212-sd3.pdf [file emmm0006-0212-sd3.pdf]

**A** ESC: *Kras<sup>LSL-G12D</sup>*

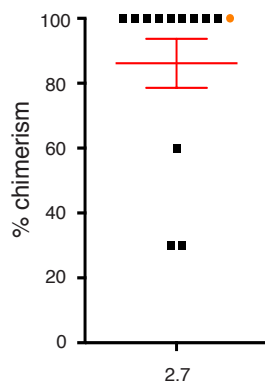

**B**

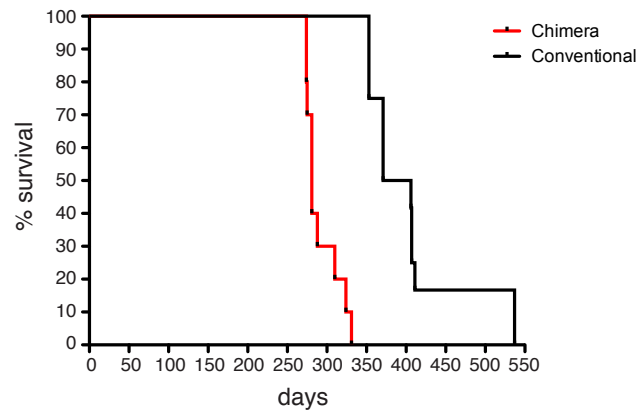

**C**

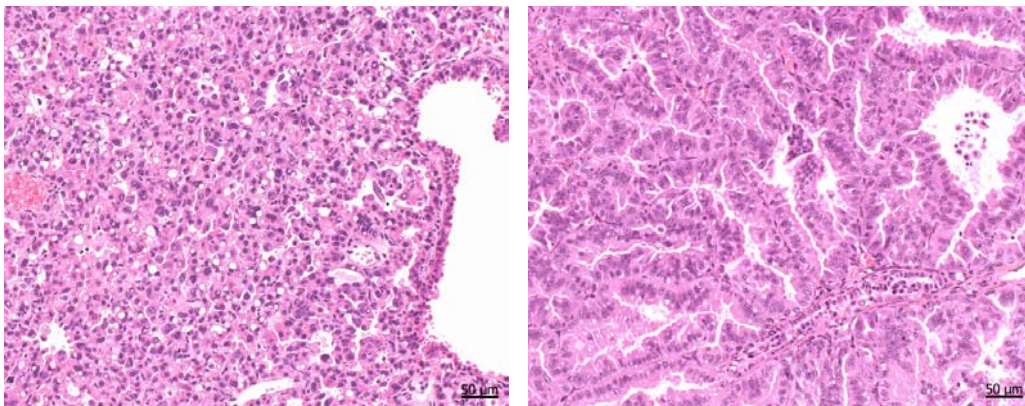

**Supporting Information Figure 2. Validation of *Kras<sup>LSL-G12D</sup>* ESCs and chimeras.**

**A.** *Kras<sup>LSL-G12D</sup>* ESC clone 2.7 was injected into FVB/n morulae and scored for its chimeric contribution. The majority of chimeras, 10 of 13, were entirely black (100% chimerism). ■ male, ● female.

**B.** Survival curves of *Kras<sup>LSL-G12D</sup>* mice intratracheally injected with Ad5-Cre. The chimeras developed NSCLC with shorter latency as compared to the conventional *Kras<sup>LSL-G12D</sup>* mice. Black line – conventional mice, Red line – chimeras.

**C.** Representative HE-stained sections of an adenocarcinoma (left panel) and a papillary carcinoma (right panel) in the lungs of chimeric mice.
