# Supplementary material for: Rapid target gene validation in complex cancer mouse models using re-derived embryonic stem cells
Source: PubMed Central journal article supplement (PMC3927956; doi:10.1002/emmm.201303297), 2014-01-15
Supplement: emmm0006-0212-sd4.pdf [file emmm0006-0212-sd4.pdf]

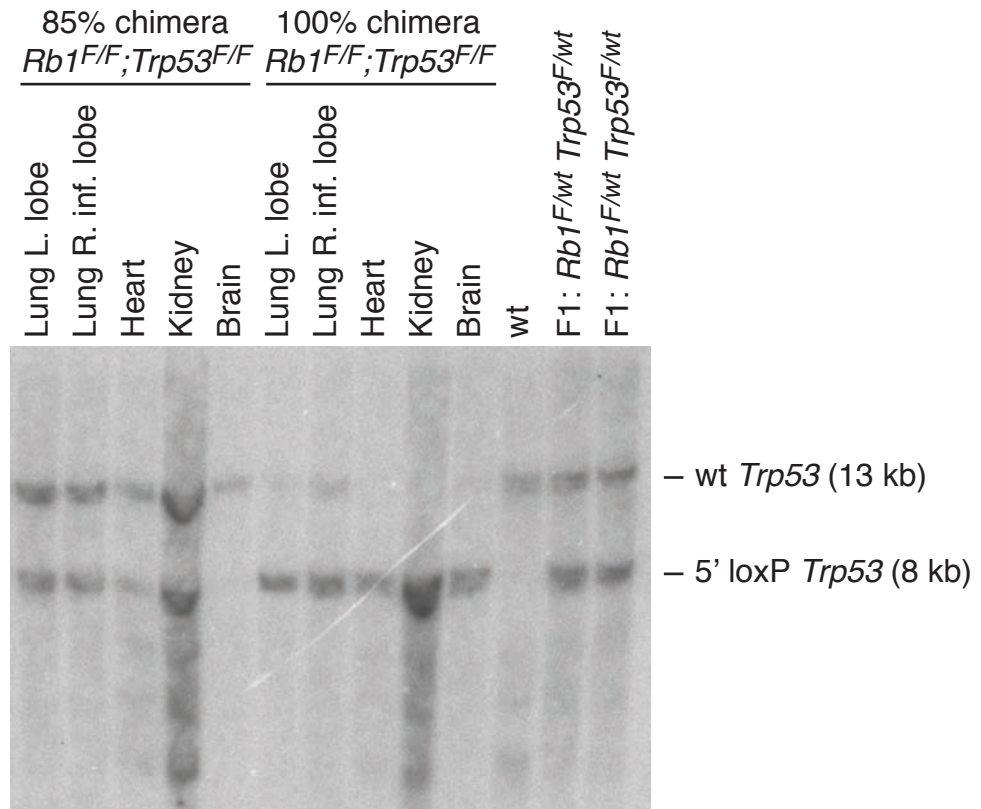

**Supporting Information Figure 3. Genetic chimerism evaluated by Southern blot analysis.**

Example of a Southern blot performed on genomic DNA extracted from five organs of two *Rb1<sup>F/F</sup>;Trp53<sup>F/F</sup>* chimeras to determine the level of genetic chimerism with a probe that distinguishes between a wildtype *Trp53* allele (13 Kb) or the floxed *Trp53* allele (8 Kb) reflecting the contribution by the host ESCs or cultured ESCs, respectively. Controls were genomic DNA extracted from a spleen of a wildtype mouse and genomic DNA of an F1 offspring of an *Rb1<sup>F/F</sup>;Trp53<sup>F/F</sup>* chimera, therefore having one conditional *Trp53* allele and one wildtype *Trp53* allele.
