# Supplementary material for: Rapid target gene validation in complex cancer mouse models using re-derived embryonic stem cells
Source: PubMed Central journal article supplement (PMC3927956; doi:10.1002/emmm.201303297), 2014-01-15
Supplement: emmm0006-0212-sd6.pdf [file emmm0006-0212-sd6.pdf]

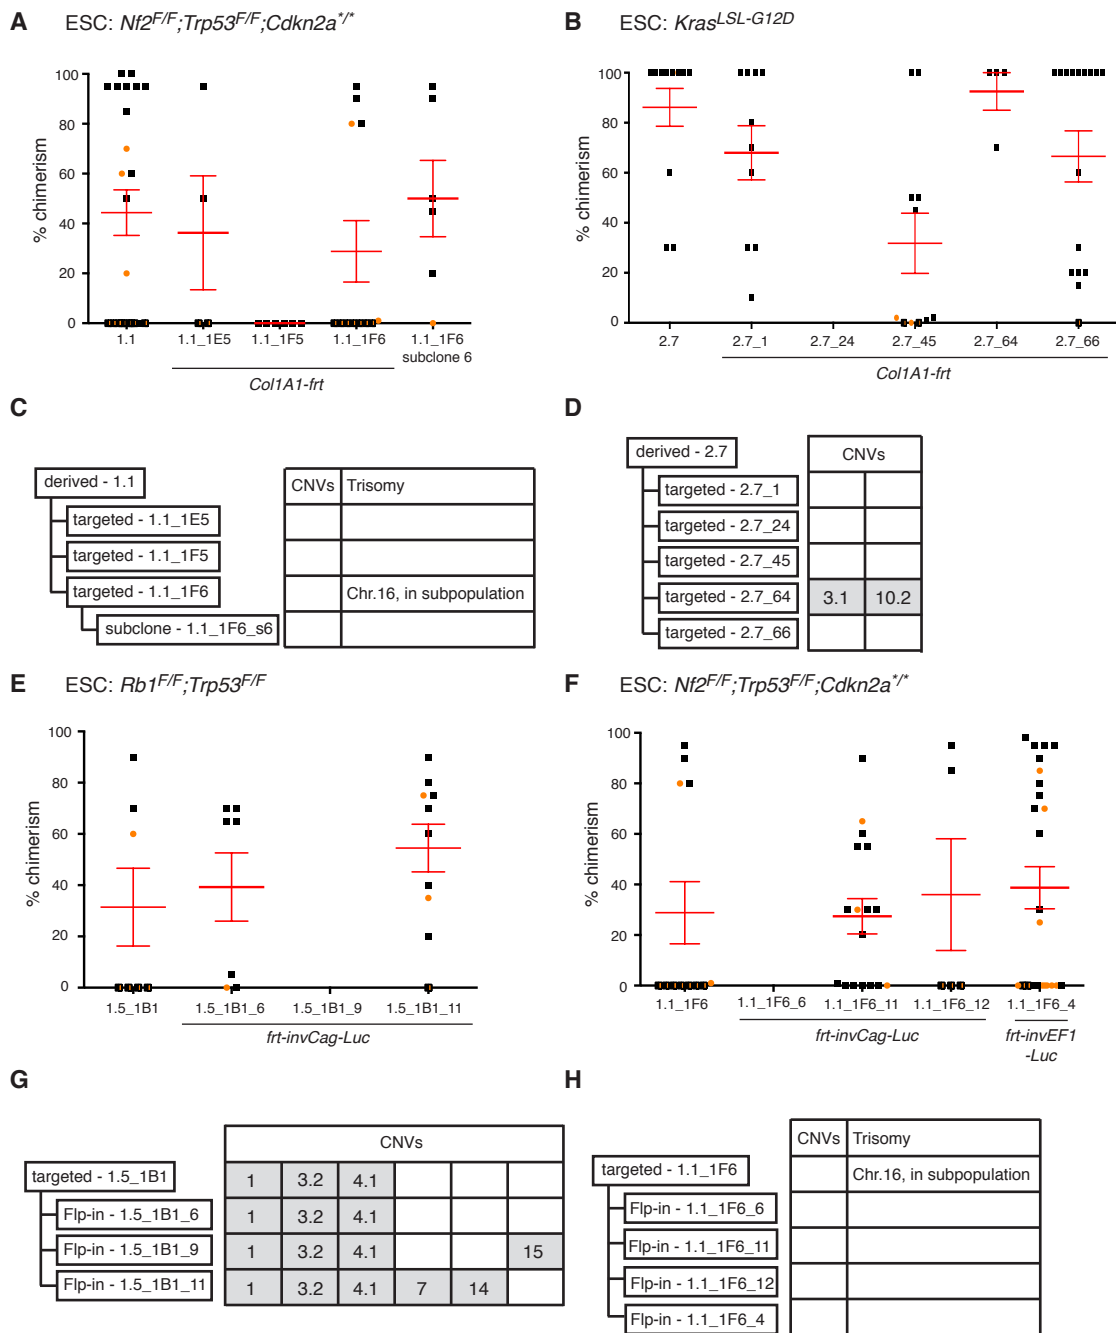

### Supporting Information Figure 5. Genomic stability of GEMM-ESC clones after targeting and Flp-in.

- A.** Comparison of chimeric contribution between the parental *Nf2<sup>F/F</sup>;Trp53<sup>F/F</sup>;Cdkn2a<sup>\*/\*</sup>* ESC clone 1.1 and three *Coll1a1-frm* targeted derivatives. Correct targeting was confirmed by Southern blot analysis using a 3' internal probe in the *Coll1a1* locus (Supporting Information Fig 4B). Two *Coll1a1-frm* targeted clones, i.e. 1.1\_1E5 and 1.1\_1F6, provided good and germline-competent chimeras (Supporting Information Table 1). Subcloning ESC clone 1.1\_1F6 did not affect the ability to generate chimeric animals as shown by subclone 6. ■ male, ● female, ■ n.d.
- B.** Comparison of chimeric contribution between the parental *Kras<sup>LSL-G12D</sup>* ESC clone 2.7 and five *Coll1a1-frm* targeted derivatives. Correct targeting was confirmed by Southern blot analysis using a 3' internal probe in the *Coll1a1* locus (Supporting information Fig. 4B). All *Coll1a1-frm* targeted clones provided good and germline-competent chimeras, except for ESC clone 2.7\_24 (Supporting information Table 1). ■ male, ● female, ■ n.d.
- C.** aCGH analysis revealed no CNVs in *Nf2<sup>F/F</sup>;Trp53<sup>F/F</sup>;Cdkn2a<sup>\*/\*</sup>* ESC clones and its derivatives, only trisomy of chromosome 16 in a subpopulation of *Coll1a1-frm* targeted ESC clone 1.1\_1F6. The latter could be resolved by subcloning.
- D.** aCGH analysis revealed no CNVs in four *Coll1a1-frm* targeted *Kras<sup>LSL-G12D</sup>* ESC clones, only targeted clone 2.7\_64 had two independent CNVs reflecting single copy gains. CNV-3.1 encoded 5 genes, CNV-10.2: 13 genes (Details in Supporting Information Table 3).
- E.** Comparison of chimeric contribution between the *Coll1a1-frm* targeted *Rb1<sup>F/F</sup>;Trp53<sup>F/F</sup>* ESC clone 1.5\_1B1 and three *frt-invCag-Luc* Flp-in derivatives. Correct Flp-in was confirmed by Southern blot analysis using a 3' internal probe in the *Coll1a1* locus (Supporting Information Fig 4D). Two *frt-invCag-Luc* Flp-in clones, i.e. 1.5\_1B1\_6 and 1.5\_1B1\_11, provided good and germline-competent chimeras (Supporting Information Table 1). ■ male, ● female, ■ n.d.
- F.** Comparison of chimeric contribution between the *Coll1a1-frm* targeted *Nf2<sup>F/F</sup>;Trp53<sup>F/F</sup>;Cdkn2a<sup>\*/\*</sup>* ESC clone 1.1\_1F6 and three *frt-invCag-Luc* Flp-in derivatives and one *frt-invEF1-Luc* Flp-in derivative. Correct Flp-in was confirmed by Southern blot analysis using a 3' internal probe in the *Coll1a1* locus (Supporting Information Fig 4D). Two *frt-invCag-Luc* Flp-in clones, i.e. 1.1\_1F6\_11 and 1.1\_1F6\_12, provided good and germline-competent chimeras. Same for *frt-invEF1-Luc* Flp-in clone 1.1\_1F6\_4 (Supporting Information Table 1). ■ male, ● female, ■ n.d.
- G.** aCGH analysis revealed three independent CNVs in two *frt-invCag-Luc* Flp-in *Rb1<sup>F/F</sup>;Trp53<sup>F/F</sup>* ESC clones again only reflecting single copy gains. CNV-7 encoded 3 genes, CNV-14: 21 genes and CNV-15: 10 genes (Details in Supporting Information Table 3).
- H.** aCGH analysis on the Luciferase reporter *Nf2<sup>F/F</sup>;Trp53<sup>F/F</sup>;Cdkn2a<sup>\*/\*</sup>* ESC clones revealed no additional chromosomal abnormalities.
