# Supplementary material for: Rapid target gene validation in complex cancer mouse models using re-derived embryonic stem cells
Source: PubMed Central journal article supplement (PMC3927956; doi:10.1002/emmm.201303297), 2014-01-15
Supplement: emmm0006-0212-sd8.pdf [file emmm0006-0212-sd8.pdf]

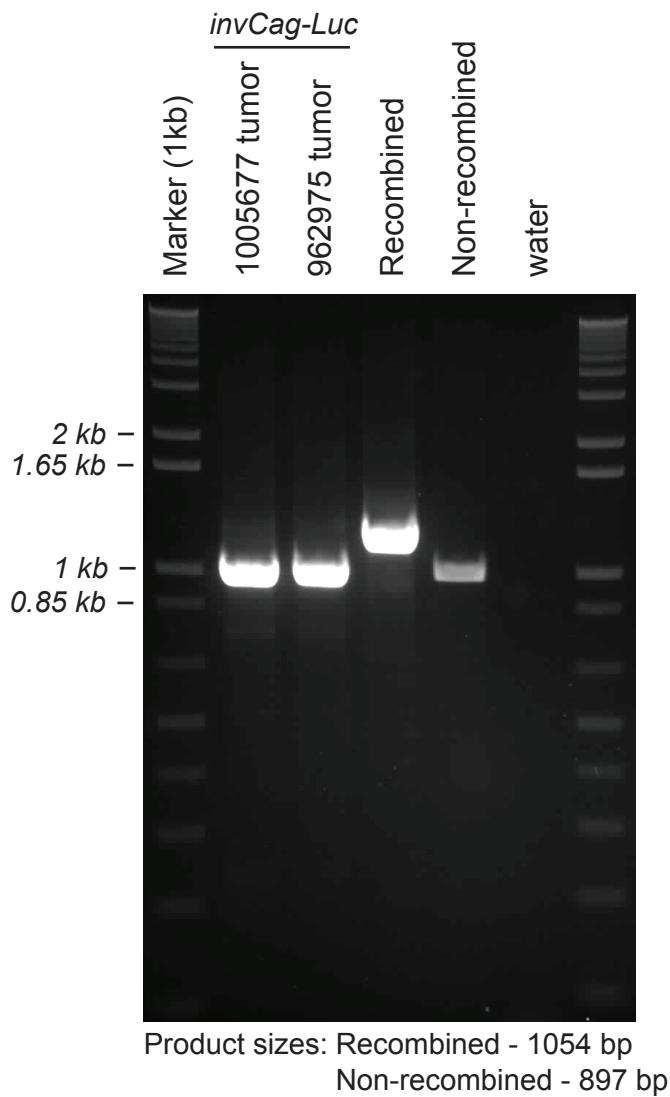

**Supporting Information Figure 7: Absence of luciferase signal in two SCLC tumors is caused by failure to recombine the *invCAG-Luc* transgene.**

Four *invCag-Luc;Rb1<sup>F/F</sup>;Trp53<sup>F/F</sup>* mice, 1 out of 10 chimeras and 3 out of 12 F1's, developed SCLC without a Luciferase signal. Genomic DNA was extracted from two of these tumors (from chimera 962975 and F1 1005677), and a PCR was performed with three primers that distinguish the recombined *invCag-Luc* transgene from the non-recombined. Three primers were used: a forward primer on Lox66 5' -GGCCGGCCATAACTTCGTATAATG-3' and two antisense primers: one located in the vector backbone: 5' -CTGCGTTATCCCCTGATTCTGTGG-3' to detect the non-recombined allele (product size: 897 bp) and one in the Hygromycin-B gene 5' -CCTACATCGAAGCTGAAAGCACGAG-3' to identify the recombined allele (product size: 1054 bp). The PCR was performed with 1x Phusion Flash high-fidelity PCR mix (Thermo Scientific) at annealing and extension temperature of 72°C.
