# Supplementary material for: Rapid target gene validation in complex cancer mouse models using re-derived embryonic stem cells
Source: PubMed Central journal article supplement (PMC3927956; doi:10.1002/emmm.201303297), 2014-01-15
Supplement: emmm0006-0212-sd10.pdf [file emmm0006-0212-sd10.pdf]

**Supporting Information Table 1. GEMM-ESC generate chimeras after both targeting and Flp-in.**

| Genotype                                                                                  | Strain            | ESC clone    | Construct                   | MGI     | No. of embryos injected <sup>§</sup> | No. born | No. of chimeras |    | GLT <sup>#</sup>     |
|-------------------------------------------------------------------------------------------|-------------------|--------------|-----------------------------|---------|--------------------------------------|----------|-----------------|----|----------------------|
|                                                                                           |                   |              |                             |         |                                      |          | M               | F  |                      |
| wt                                                                                        | C57BL/6J          | 1.3          |                             |         | 46 B                                 | 22       | 7               | 10 | 0/4                  |
|                                                                                           |                   | 1.4          |                             |         | 63 B                                 | 36       | 18              | 7  | 1/4                  |
|                                                                                           |                   | 1.4          |                             |         | 159 M-                               | 13       | 2               | 0  | n.d.                 |
|                                                                                           |                   | 1.4          |                             |         | 72 M                                 | 25       | 16              | 2  | 2/4                  |
| wt                                                                                        | FVB/n             | 1.2          |                             |         | 23 B                                 | 10       | 5               | 3  | 2/5                  |
|                                                                                           |                   | 1.3          |                             |         | 48 B                                 | 18       | 10              | 3  | 3/10                 |
|                                                                                           |                   | 1.3          |                             |         | 38 M                                 | 6        | 4               | 0  | 2/3                  |
| <i>Kras</i> <sup>LSL-G12D</sup>                                                           | C57BL/6J          | 2.7          |                             |         | 106 M                                | 13       | 12              | 1  | 2/3                  |
| <i>Rb1</i> <sup>F1F</sup> ; <i>Trp53</i> <sup>F1F</sup>                                   | FVB/n;<br>129/Ola | 1.5          |                             |         | 45 B                                 | 6        | 6               | 0  | 3/3                  |
|                                                                                           |                   | 1.10         |                             |         | 39 B                                 | 10       | 6               | 3  | 2/2                  |
|                                                                                           |                   | 1.14         |                             |         | 62 B                                 | 24       | 14              | 2  | 5/5                  |
| <i>Nf2</i> <sup>F1F</sup> ; <i>Trp53</i> <sup>F1F</sup> ;<br><i>Cdkn2a</i> <sup>*/*</sup> | FVB/n;<br>129/Ola | 1.1          |                             |         | 49 B                                 | 23       | 10              | 3  | 4/4                  |
|                                                                                           |                   | 1.1          |                             |         | 65 M                                 | 5        | 3               | 0  | 3/3                  |
|                                                                                           |                   | 1.5          |                             |         | 82 B                                 | 22       | 11              | 0  | 2/2                  |
| <i>Kras</i> <sup>LSL-G12D</sup>                                                           | C57BL/6J          | 2.7_1        | <i>Coll1A1-frt</i>          | 5443860 | 60 M                                 | 10       | 10              | 0  | 3/3                  |
|                                                                                           |                   | 2.7_24       | <i>Coll1A1-frt</i>          | 5443860 | 48 M                                 | 0        | -               | -  | -                    |
|                                                                                           |                   | 2.7_45       | <i>Coll1A1-frt</i>          | 5443860 | 126 M                                | 10       | 7               | 1  | 1/2                  |
|                                                                                           |                   | 2.7_64       | <i>Coll1A1-frt</i>          | 5443860 | 32 M                                 | 4        | 4               | 0  | 3/3                  |
|                                                                                           |                   | 2.7_66       | <i>Coll1A1-frt</i>          | 5443860 | 88 M                                 | 16       | 15              | 0  | 2/2                  |
| <i>Rb1</i> <sup>F1F</sup> ; <i>Trp53</i> <sup>F1F</sup>                                   | FVB/n;<br>129/Ola | 1.5_1A9      | <i>Coll1A1-frt</i>          | 5443861 | 88 B                                 | 0        | -               | -  | -                    |
|                                                                                           |                   | 1.5_1A10     | <i>Coll1A1-frt</i>          | 5443861 | 66 B                                 | 3        | 2               | 1  | 2/2                  |
|                                                                                           |                   | 1.5_1B1      | <i>Coll1A1-frt</i>          | 5443861 | 32 B                                 | 7        | 2               | 1  | 2/2                  |
|                                                                                           |                   | 1.5_1B1_r4   | <i>Coll1A1-frt</i>          | 5443861 | 62 B                                 | 15       | 8               | 1  | 2/2                  |
| <i>Nf2</i> <sup>F1F</sup> ; <i>Trp53</i> <sup>F1F</sup> ;<br><i>Cdkn2a</i> <sup>*/*</sup> | FVB/n;<br>129/Ola | 1.1_1E5      | <i>Coll1A1-frt</i>          | 5443866 | 29 B                                 | 4        | 2               | 0  | n.d.                 |
|                                                                                           |                   | 1.1_1F5      | <i>Coll1A1-frt</i>          | 5443866 | 75 B                                 | 6        | 0               | 0  | -                    |
|                                                                                           |                   | 1.1_1F6      | <i>Coll1A1-frt</i>          | 5443866 | 62 B                                 | 12       | 3               | 2  | n.d.                 |
|                                                                                           |                   | 1.1_1F6_s6   | <i>Coll1A1-frt</i>          | 5443866 | 53 B                                 | 6        | 5               | 0  | 3/3                  |
| <i>Rb1</i> <sup>F1F</sup> ; <i>Trp53</i> <sup>F1F</sup>                                   | FVB/n;<br>129/Ola | 1.5_1B1_6    | <i>frt-invCag-Luc</i>       | 5443879 | 36 B                                 | 7        | 5               | 0  | 1/1                  |
|                                                                                           |                   | 1.5_1B1_9    | <i>frt-invCag-Luc</i>       | 5443879 | 16 B                                 | 0        | -               | -  | -                    |
|                                                                                           |                   | 1.5_1B1_11   | <i>frt-invCag-Luc</i>       | 5443879 | 55 B                                 | 10       | 7               | 2  | 2/2                  |
|                                                                                           |                   | 1.5_1B1_r4_1 | <i>frt-invCag-MycL1-Luc</i> | 5499626 | 72 B                                 | 7        | 4               | 3  | 1/2                  |
|                                                                                           |                   | 1.5_1B1_r4_4 | <i>frt-invCag-MycL1-Luc</i> | 5499626 | 95 B                                 | 11       | 8               | 1  | 3/3                  |
| <i>Nf2</i> <sup>F1F</sup> ; <i>Trp53</i> <sup>F1F</sup> ;<br><i>Cdkn2a</i> <sup>*/*</sup> | FVB/n;<br>129/Ola | 1.1_1F6_6    | <i>frt-invCag-Luc</i>       | 5443888 | 80 B                                 | 0        | -               | -  | -                    |
|                                                                                           |                   | 1.1_1F6_11   | <i>frt-invCag-Luc</i>       | 5443888 | 94 B                                 | 17       | 9               | 2  | 1/1 <sup>&amp;</sup> |
|                                                                                           |                   | 1.1_1F6_12   | <i>frt-invCag-Luc</i>       | 5443888 | 89 B                                 | 5        | 2               | 0  | 1/1                  |
|                                                                                           |                   | 1.1_1F6_4    | <i>frt-invEF1-Luc</i>       | 5443891 | 125 B                                | 25       | 10              | 3  | 3/4                  |

<sup>§</sup> B: ESCs injected into blastocysts. M-: ESCs injected into morulae without overnight culture. M: ESCs injected into morulae followed by overnight culture. <sup>#</sup> For wt genotypes, first litter was scored for transmission of coat color. For genetically modified genotypes, first litter was PCR screened for presence of mutant allele. <sup>&</sup> Germline transmission of mutant allele observed in second litter.
