# Supplementary material for: Rapid target gene validation in complex cancer mouse models using re-derived embryonic stem cells
Source: PubMed Central journal article supplement (PMC3927956; doi:10.1002/emmm.201303297), 2014-01-15
Supplement: emmm0006-0212-sd11.pdf [file emmm0006-0212-sd11.pdf]

**Supporting Information Table 2. Targeting and Flp-in efficiency**

| Genotype                                                                                                          | Strain        | Clone  | Construct <sup>#</sup>      | Positive clones of total | Recombination efficiency |
|-------------------------------------------------------------------------------------------------------------------|---------------|--------|-----------------------------|--------------------------|--------------------------|
| wt                                                                                                                | 129/Ola       | 1B10   | <i>Col1A1-<i>frt</i></i>    | 13 of 36                 | 36,1%                    |
| <i>Kras</i> <sup>LSL-G12D</sup>                                                                                   | C57BL/6J      | 2.7    | <i>Col1A1-<i>frt</i></i>    | 36 of 96                 | 37,5%                    |
| <i>Rb1</i> <sup>F/F</sup> ; <i>Trp53</i> <sup>F/F</sup>                                                           | FVB/n;129/Ola | 1.5    | <i>Col1A1-<i>frt</i></i>    | 11 of 32                 | 34,4%                    |
| <i>Nf2</i> <sup>F/F</sup> ; <i>Trp53</i> <sup>F/F</sup> ; <i>Cdkn2a</i> <sup>q/q</sup>                            | FVB/n;129/Ola | 1.1    | <i>Col1A1-<i>frt</i></i>    | 54 of 156                | 34,6%                    |
| <i>Rb1</i> <sup>F/F</sup> ; <i>Trp53</i> <sup>F/F</sup> ; <i>Col1A1-<i>frt</i></i>                                | FVB/n;129/Ola | 1B1    | <i>frt-invCag-Luc</i>       | 12 of 12                 | 100%                     |
| <i>Rb1</i> <sup>F/F</sup> ; <i>Trp53</i> <sup>F/F</sup> ; <i>Col1A1-<i>frt</i></i>                                | FVB/n;129/Ola | 1B1_r4 | <i>Frt-invCag-MycL1-Luc</i> | 6 of 6                   | 100%                     |
| <i>Nf2</i> <sup>F/F</sup> ; <i>Trp53</i> <sup>F/F</sup> ; <i>Cdkn2a</i> <sup>q/q</sup> ; <i>Col1A1-<i>frt</i></i> | FVB/n;129/Ola | 1F6    | <i>frt-invCag-Luc</i>       | 12 of 12                 | 100%                     |
| <i>Nf2</i> <sup>F/F</sup> ; <i>Trp53</i> <sup>F/F</sup> ; <i>Cdkn2a</i> <sup>q/q</sup> ; <i>Col1A1-<i>frt</i></i> | FVB/n;129/Ola | 1F6    | <i>frt-invEF1-Luc</i>       | 4 of 4                   | 100%                     |

<sup>#</sup> Homology arms in targeting constructs were syngeneic to target loci in all GEMM-ESC clones.
