# Supplementary material for: Rapid target gene validation in complex cancer mouse models using re-derived embryonic stem cells
Source: PubMed Central journal article supplement (PMC3927956; doi:10.1002/emmm.201303297), 2014-01-15
Supplement: emmm0006-0212-sd12.pdf [file emmm0006-0212-sd12.pdf]

Supporting Information Table 3. Description of CNVs

| ID       | GEMM-ESC                       |                                                        |                                                                                    | chr | Coordinates<br>(Ensembl m37) | Length (Mb) | Number of genes | Genes Involved*                                                                                                                                                                                                                                                                                                                                                                                                                                                                                                                    |
|----------|--------------------------------|--------------------------------------------------------|------------------------------------------------------------------------------------|-----|------------------------------|-------------|-----------------|------------------------------------------------------------------------------------------------------------------------------------------------------------------------------------------------------------------------------------------------------------------------------------------------------------------------------------------------------------------------------------------------------------------------------------------------------------------------------------------------------------------------------------|
|          | <i>Kras</i> <sup>SL-G12D</sup> | <i>Rb1</i> <sup>TRE</sup> ; <i>Trp53</i> <sup>FF</sup> | <i>Nf2</i> <sup>FF</sup> ; <i>Trp53</i> <sup>FF</sup> ; <i>Cdkn2a</i> <sup>T</sup> |     |                              |             |                 |                                                                                                                                                                                                                                                                                                                                                                                                                                                                                                                                    |
| CNV-1    |                                |                                                        |                                                                                    | 1   | 136193359 136645994          | 0,453       | 10              | <i>Ppfia4</i> ; <i>Tmem183a</i> ; <i>Cyb5r1</i> ; <i>Adipor1</i> ; <i>Klhl12</i> ; <i>Rabif</i> ; <i>Kdm5b</i> ; <i>Syt2</i>                                                                                                                                                                                                                                                                                                                                                                                                       |
| CNV-2    |                                |                                                        |                                                                                    | 2   | 92755257 93662725            | 0,907       | 13              | <i>Syt13</i> ; <i>Prdm11</i> ; <i>Trp53i11</i> ; <i>Tspan18</i> ; <i>Cd82</i> ; <i>Alx4</i> ; <i>Ext2</i>                                                                                                                                                                                                                                                                                                                                                                                                                          |
| CNV-3.1  |                                |                                                        |                                                                                    | 3   | 101890432 102249055          | 0,359       | 5               | <i>Casq2</i> ; <i>Vangl1</i>                                                                                                                                                                                                                                                                                                                                                                                                                                                                                                       |
| CNV-3.2  |                                |                                                        |                                                                                    | 3   | 96111178 96350050            | 0,239       | 7               | <i>Rnu1b2</i> ; <i>Terc</i> ; <i>Hfe2</i>                                                                                                                                                                                                                                                                                                                                                                                                                                                                                          |
| CNV-4.1  |                                |                                                        |                                                                                    | 4   | 123026875 123614240          | 0,587       | 18              | <i>Macf1</i> ; <i>Ndufs5</i> ; <i>Akirin1</i> ; <i>Rhbdl2</i> ; <i>Mycbp</i> ; <i>Rragc</i> ; <i>Rragd</i>                                                                                                                                                                                                                                                                                                                                                                                                                         |
| CNV-4.2  |                                |                                                        |                                                                                    | 4   | 129193347 129586376          | 0,393       | 18              | <i>Hdac1</i> ; <i>Lck</i> ; <i>Fam167b</i> ; <i>Eif3i</i> ; <i>Dcdc2b</i> ; <i>Iqcc</i> ; <i>Ccdc28b</i> ; <i>Txlna</i> ; <i>Kpna6</i> ; <i>Tmem39b</i> ; <i>Khdrbs1</i> ; <i>Ptp4a2</i>                                                                                                                                                                                                                                                                                                                                           |
| CNV-7    |                                |                                                        |                                                                                    | 7   | 103359146 103880790          | 0,522       | 3               | <i>Odz4</i> ; <i>Mir708</i>                                                                                                                                                                                                                                                                                                                                                                                                                                                                                                        |
| CNV-8    |                                |                                                        |                                                                                    | 8   | 86912339 87956740            | 1,044       | 46              | <i>Cacna1a</i> ; <i>Ier2</i> ; <i>Nacc1</i> ; <i>Trmt1</i> , <i>Lyl1</i> ; <i>Nfix</i> ; <i>SP1</i> ; <i>Dand5</i> ; <i>Gadd45gip1</i> ; <i>Rad23a</i> ; <i>Cair</i> ; <i>Farsa</i> ; <i>Syce2</i> ; <i>Gcdh</i> ; <i>Klf1</i> ; <i>Dnase2a</i> ; <i>Mast1</i> ; <i>Rtbdn</i> ; <i>Rnaseh2a</i> ; <i>Prdx2</i> ; <i>Junb</i> ; <i>Hook2</i> ; <i>Best2</i> ; <i>Asna1</i> ; <i>Tnpo2</i> ; <i>Fbxw9</i> ; <i>Dhps</i> ; <i>Wdr83</i> ; <i>Man2b1</i> ; <i>Zfp791</i> ; <i>Olfir371</i> ; <i>Vps35</i> ; <i>Orc6</i> ; <i>Mylk3</i> |
| CNV-10.1 |                                |                                                        |                                                                                    | 10  | 36853048 88392260            | 51,539      | 871             |                                                                                                                                                                                                                                                                                                                                                                                                                                                                                                                                    |
| CNV-10.2 |                                |                                                        |                                                                                    | 10  | 41210244 41996548            | 0,786       | 13              | <i>Ppil6</i> ; <i>Cd164</i> ; <i>Ccdc162</i> ; <i>Cep57l1</i> ; <i>Sesn1</i> ; <i>Armc2</i> ; <i>Foxo3</i>                                                                                                                                                                                                                                                                                                                                                                                                                         |
| CNV-11   |                                |                                                        |                                                                                    | 11  | 61156901 62129943            | 0,973       | 18              | <i>Slc47a1</i> ; <i>Rnf112</i> ; <i>Mfap4</i> ; <i>Mapk7</i> ; <i>B9d1</i> ; <i>Epn2</i> ; <i>Grap</i> ; <i>Slc5a10</i> ; <i>Fam83g</i> ; <i>Prpsap2</i> ; <i>Ulk2</i> ; <i>Specc1</i> ; <i>Adora2b</i> ; <i>Zswim7</i> ; <i>Ttc19</i>                                                                                                                                                                                                                                                                                             |
| CNV-13   |                                |                                                        |                                                                                    | 13  | 54146552 54570201            | 0,424       | 5               | <i>Drd1a</i> ; <i>Sfxn1</i> ; <i>Hrh2</i> ; <i>Cplx2</i> ; <i>Thoc3</i>                                                                                                                                                                                                                                                                                                                                                                                                                                                            |
| CNV-14   |                                |                                                        |                                                                                    | 14  | 118536348 120906414          | 2,370       | 21              | <i>Gpr180</i> ; <i>Sox21</i> ; <i>Abcc4</i> ; <i>Cldn10</i> ; <i>Dzip1</i> ; <i>Dnajc3</i> ; <i>Ugcgl2</i> ; <i>Hs6st3</i> ; <i>Oxgr1</i> ; <i>Mbnl2</i> ; <i>Rap2a</i>                                                                                                                                                                                                                                                                                                                                                            |
| CNV-15   |                                |                                                        |                                                                                    | 15  | 84895118 85498105            | 0,603       | 10              | <i>Smc1b</i> ; <i>Ribc2</i> ; <i>Fbin1</i> ; <i>Atxn10</i> ; <i>Wnt7b</i>                                                                                                                                                                                                                                                                                                                                                                                                                                                          |
| CNV-16   |                                |                                                        |                                                                                    | 16  | 29396123 30388616            | 0,992       | 12              | <i>Atp13a4</i> ; <i>Opa1</i> ; <i>Hes1</i> ; <i>Cpn2</i> ; <i>Lrrc15</i> ; <i>Gp5</i>                                                                                                                                                                                                                                                                                                                                                                                                                                              |
| CNV-17   |                                |                                                        |                                                                                    | 17  | 44914119 46557867            | 1,644       | 39              | <i>Supt3h</i> ; <i>Cdc5l</i> ; <i>Spats1</i> ; <i>Gm9104</i> ; <i>Aars2</i> ; <i>Tcte1</i> ; <i>Tmem151b</i> ; <i>Nfkbie</i> ; <i>Slc35b2</i> ; <i>Hsp90ab1</i> ; <i>Slc29a1</i> ; <i>Ent1</i> ; <i>Capn11</i> ; <i>Tmem63b</i> ; <i>Mrpl14</i> ; <i>Vegfa</i> ; <i>Mrps18a</i> ; <i>Rsph9</i> ; <i>Mad2l1bp</i> ; <i>Gtpbp2</i> ; <i>Polh</i> ; <i>Xpo5</i> ; <i>Mir693</i> ; <i>Polric</i> ; <i>Yipf3</i> ; <i>Tjap1</i> ; <i>Dlk2</i> ; <i>Abcc10</i> ; <i>Zfp318</i>                                                           |
| CNV-X    |                                |                                                        |                                                                                    | X   | 111588128 112022119          | 0,434       | 4               | <i>Klhl4</i> ; <i>Ube2dnl</i>                                                                                                                                                                                                                                                                                                                                                                                                                                                                                                      |

 CNVs detected in GEMM-ESC clones

\* Only some of the known genes are listed. The gene annotations are from Ensembl: [www.ensembl.org/Mus\\_musculus/index.html](http://www.ensembl.org/Mus_musculus/index.html)
