# Supplementary material for: Rapid target gene validation in complex cancer mouse models using re-derived embryonic stem cells
Source: PubMed Central journal article supplement (PMC3927956; doi:10.1002/emmm.201303297), 2014-01-15
Supplement: emmm0006-0212-sd13.pdf [file emmm0006-0212-sd13.pdf]

Supporting Information Table 4. Distribution of CNVs in GEMM-ESC clones listed in Supporting Information Table 3

|                                                                |                            | Copy Number Variant   |          |   |   |     |     |     |     |   |   |      |      |    |    |    |    |    |    |   |        |
|----------------------------------------------------------------|----------------------------|-----------------------|----------|---|---|-----|-----|-----|-----|---|---|------|------|----|----|----|----|----|----|---|--------|
|                                                                |                            | aCGH                  | Chimeras |   |   |     |     |     |     |   |   |      |      |    |    |    |    |    |    |   |        |
| GEMM-ESC clone                                                 | reference - ESC clone      | reference - ESC clone |          | 1 | 2 | 3.1 | 3.2 | 4.1 | 4.2 | 7 | 8 | 10.1 | 10.2 | 11 | 13 | 14 | 15 | 16 | 17 | X | lost Y |
| <b>Kras<sup>SL-G12D</sup></b>                                  | Col1A1-frt 1               | 2.7                   | Y        |   |   |     |     |     |     |   |   |      |      |    |    |    |    |    |    |   |        |
|                                                                | Col1A1-frt 13              | 2.7                   |          |   |   |     |     |     |     |   |   |      |      |    |    |    |    |    |    |   |        |
|                                                                | Col1A1-frt 24              | 2.7                   | N        |   |   |     |     |     |     |   |   |      |      |    |    |    |    |    |    |   |        |
|                                                                | Col1A1-frt 34              | 2.7                   |          |   |   |     |     |     |     |   |   |      |      |    |    |    |    |    |    |   |        |
|                                                                | Col1A1-frt 39              | 2.7                   |          |   |   |     |     |     |     |   |   |      |      |    |    |    |    |    |    |   |        |
|                                                                | Col1A1-frt 45              | 2.7                   | Y        |   |   |     |     |     |     |   |   |      |      |    |    |    |    |    |    |   |        |
|                                                                | Col1A1-frt 64              | 2.7                   | Y        |   |   |     |     |     |     |   |   |      |      |    |    |    |    |    |    |   |        |
|                                                                | Col1A1-frt 66              | 2.7                   | Y        |   |   |     |     |     |     |   |   |      |      |    |    |    |    |    |    |   |        |
|                                                                | Col1A1-frt 79              | 2.7                   |          |   |   |     |     |     |     |   |   |      |      |    |    |    |    |    |    |   |        |
|                                                                | Col1A1-frt 90              | 2.7                   |          |   |   |     |     |     |     |   |   |      |      |    |    |    |    |    |    |   |        |
|                                                                | 2.7 subclone 1             | 2.7                   |          |   |   |     |     |     |     |   |   |      |      |    |    |    |    |    |    |   |        |
|                                                                | 2.7 subclone 2             | 2.7                   |          |   |   |     |     |     |     |   |   |      |      |    |    |    |    |    |    |   |        |
|                                                                | 2.7 subclone 3             | 2.7                   |          |   |   |     |     |     |     |   |   |      |      |    |    |    |    |    |    |   |        |
|                                                                | 2.7 subclone 4             | 2.7                   |          |   |   |     |     |     |     |   |   |      |      |    |    |    |    |    |    |   |        |
|                                                                | 2.7 subclone 5             | 2.7                   |          |   |   |     |     |     |     |   |   |      |      |    |    |    |    |    |    |   |        |
|                                                                | 2.7 subclone 6             | 2.7                   |          |   |   |     |     |     |     |   |   |      |      |    |    |    |    |    |    |   |        |
|                                                                | 2.7 subclone 7             | 2.7                   |          |   |   |     |     |     |     |   |   |      |      |    |    |    |    |    |    |   |        |
|                                                                | 2.7 subclone 8             | 2.7                   |          |   |   |     |     |     |     |   |   |      |      |    |    |    |    |    |    |   |        |
|                                                                | 2.7 subclone 9             | 2.7                   |          |   |   |     |     |     |     |   |   |      |      |    |    |    |    |    |    |   |        |
| 2.7 subclone 11                                                | 2.7                        |                       |          |   |   |     |     |     |     |   |   |      |      |    |    |    |    |    |    |   |        |
| <b>Rb1<sup>FF</sup>;Trp53<sup>DF</sup></b>                     | Col1A1-frt 1A9             | 1.5                   | N        |   |   |     |     |     |     |   |   |      |      |    |    |    |    |    |    |   |        |
|                                                                | Col1A1-frt 1A10            | 1.5                   | Y        |   |   |     |     |     |     |   |   |      |      |    |    |    |    |    |    |   |        |
|                                                                | Col1A1-frt 1B1             | 1.5                   | Y        |   |   |     |     |     |     |   |   |      |      |    |    |    |    |    |    |   |        |
|                                                                | frt-invCag-Luc 6           | 1.5_1B1               | Y        |   |   |     |     |     |     |   |   |      |      |    |    |    |    |    |    |   |        |
|                                                                | frt-invCag-Luc 9           | 1.5_1B1               | N        |   |   |     |     |     |     |   |   |      |      |    |    |    |    |    |    |   |        |
|                                                                | frt-invCag-Luc 11          | 1.5_1B1               | Y        |   |   |     |     |     |     |   |   |      |      |    |    |    |    |    |    |   |        |
|                                                                | Col1A1-frt 1B1 rederived 4 | 1.5_1B1               | Y        |   |   |     |     |     |     |   |   |      |      |    |    |    |    |    |    |   |        |
| <b>Nf2<sup>FF</sup>;Trp53<sup>DF</sup>;Cdkn2a<sup>FF</sup></b> | Col1A1-frt 1E5             | 1.1                   | Y        |   |   |     |     |     |     |   |   |      |      |    |    |    |    |    |    |   |        |
|                                                                | Col1A1-frt 1F5             | 1.1                   | N        |   |   |     |     |     |     |   |   |      |      |    |    |    |    |    |    |   |        |
|                                                                | Col1A1-frt 1F6             | 1.1                   | Y        |   |   |     |     |     |     |   |   |      |      |    |    |    |    |    |    |   |        |
|                                                                | frt-invCag-Luc 1           | 1.1_1F6               |          |   |   |     |     |     |     |   |   |      |      |    |    |    |    |    |    |   |        |
|                                                                | frt-invCag-Luc 2           | 1.1_1F6               |          |   |   |     |     |     |     |   |   |      |      |    |    |    |    |    |    |   |        |
|                                                                | frt-invCag-Luc 3           | 1.1_1F6               |          |   |   |     |     |     |     |   |   |      |      |    |    |    |    |    |    |   |        |
|                                                                | frt-invCag-Luc 5           | 1.1_1F6               |          |   |   |     |     |     |     |   |   |      |      |    |    |    |    |    |    |   |        |
|                                                                | frt-invCag-Luc 6           | 1.1_1F6               | N        |   |   |     |     |     |     |   |   |      |      |    |    |    |    |    |    |   |        |
|                                                                | frt-invCag-Luc 7           | 1.1_1F6               |          |   |   |     |     |     |     |   |   |      |      |    |    |    |    |    |    |   |        |
|                                                                | frt-invCag-Luc 8           | 1.1_1F6               |          |   |   |     |     |     |     |   |   |      |      |    |    |    |    |    |    |   |        |
|                                                                | frt-invCag-Luc 11          | 1.1_1F6               | Y        |   |   |     |     |     |     |   |   |      |      |    |    |    |    |    |    |   |        |
|                                                                | frt-invCag-Luc 12          | 1.1_1F6               | Y        |   |   |     |     |     |     |   |   |      |      |    |    |    |    |    |    |   |        |
|                                                                | frt-invEF1-Luc 1           | 1.1_1F6               |          |   |   |     |     |     |     |   |   |      |      |    |    |    |    |    |    |   |        |
|                                                                | frt-invEF1-Luc 2           | 1.1_1F6               |          |   |   |     |     |     |     |   |   |      |      |    |    |    |    |    |    |   |        |
|                                                                | frt-invEF1-Luc 3           | 1.1_1F6               |          |   |   |     |     |     |     |   |   |      |      |    |    |    |    |    |    |   |        |
| frt-invEF1-Luc 4                                               | 1.1_1F6                    | Y                     |          |   |   |     |     |     |     |   |   |      |      |    |    |    |    |    |    |   |        |
| Col1a1-frt 1F6 subclone 1                                      | 1.1_1F6                    |                       |          |   |   |     |     |     |     |   |   |      |      |    |    |    |    |    |    |   |        |
| Col1a1-frt 1F6 subclone 3                                      | 1.1_1F6                    |                       |          |   |   |     |     |     |     |   |   |      |      |    |    |    |    |    |    |   |        |
| Col1a1-frt 1F6 subclone 5                                      | 1.1_1F6                    |                       |          |   |   |     |     |     |     |   |   |      |      |    |    |    |    |    |    |   |        |
| Col1a1-frt 1F6 subclone 6                                      | 1.1_1F6                    | Y                     |          |   |   |     |     |     |     |   |   |      |      |    |    |    |    |    |    |   |        |

 CNV detected once in GEMM-ESC clones  
 CNVs detected in multiple GEMM-ESC clones from the same parental clone  
 Trisomy observed in a subpopulation of a GEMM-ESC clone
