# Supplementary material for: Rapid target gene validation in complex cancer mouse models using re-derived embryonic stem cells
Source: PubMed Central journal article supplement (PMC3927956; doi:10.1002/emmm.201303297), 2014-01-15
Supplement: emmm0006-0212-sd14.pdf [file emmm0006-0212-sd14.pdf]

**Supporting Information Table 5. Sequences of real time PCR primers**

---

| <b>Primer name</b> | <b>Primer sequence</b>          |
|--------------------|---------------------------------|
| MycL1 F            | 5' - AGACTCAGGCCTGCTC -3'       |
| MycL1 R            | 5' - GATTTCAAACAGCGGTAGATAG -3' |
| Actin F            | 5' - TTCAACACCCCAGCCATGTA -3'   |
| Actin R            | 5' - TGTGGTACGACCAGAGGCATAC -3' |
| GapdH F            | 5' - TGGAAGATGGTGATGGGCTT -3'   |
| GapdH R            | 5' - AACGACCCCTTCATTGACCT -3'   |
| Tfrf F             | 5' - TGTAATTGGGTATAGGCTTGCA -3' |
| Tfrf R             | 5' - ATCCTGTACTCAAGAATTGGCT -3' |
| Tert F             | 5' - TCGAACAGCAAACCAACAGG -3'   |
| Tert R             | 5' - AGAGACAGGCCCGAAGAAAA -3'   |

---
